# Supplementary material
Source: publisher site journal article supplement (https://www.dovepress.com/article/596046)
Supplement: Supplementary file 1 [file 596046%20Supplementary%20Table%201%20KS.docx]

**Supplementary Table S1.** Individual polysomnographic characteristics of pediatric patients with Moyamoya arteriopathy after revascularization surgery.

| Case No. | Diagnosis | Associated condition | RNF mutation | Age (years) | BMI (kg/m2) | TST (min) | Sleep efficiency (%) | Sleep onset (min) | REM latency (min) | OAHI (events/hr) | CAHI (events/hr) | Spontaneous Arousal index (events/hr) | Sleep fragmentation | ODI (events/hr) | Average SpO2 (%) | Nadir SpO2 (%) | Average TcCO2 (mmHg) | PLMI (events/hr) |
| --- | --- | --- | --- | --- | --- | --- | --- | --- | --- | --- | --- | --- | --- | --- | --- | --- | --- | --- |
| 1. | MMD | none | positive | 15 | 37.2 | 346 | 76 | 78 | 70.5 | 0 | 0.2 | 8.8 | Yes | 1.7 | 98 | 94 | 35 | 0 |
| 2. | MMD | none | positive | 18 | 17.3 | 406 | 87.1 | 29 | 108 | 0.1 | 0.6 | 12.4 | Yes | 0 | 99 | 97 | 43.3 | 0 |
| 3. | MMD | none | positive | 4 | 15.7 | 432.5 | 95 | 5.6 | 53.5 | 0.1 | 1.8 | 7.5 | No | 3.3 | 98 | 93 | 41 | 0 |
| 4. | MMD | none | negative | 11 | 19.3 | 401 | 86.6 | 3.3 | 109 | 4.2 | 2.2 | 15 | Yes | 4.2 | 99 | 87 | 45 | 0 |
| 5. | MMS | Beta thalassemia | negative | 17 | 18.9 | 403 | 86.2 | 9 | 81 | 0 | 0 | 10.4 | Yes | 0 | 98 | 90 | 42 | 0 |
| 6. | MMS | NF type 1 | negative | 12 | 20.7 | 443.5 | 93.2 | 14.7 | 159 | 1.8 | 0.4 | 17 | Yes | 10.8 | 97 | 91 | 37 | 3.1 |
| 7. | MMD | none | positive | 15 | 22.7 | 177 | 48.1 | 133 | 66 | 5.4 | 0.3 | 16.6 | Yes | 4.4 | 97 | 92 | 40 | 0 |
| 8. | MMD | none | positive | 14 | 28.4 | 389.5 | 87.1 | 11.5 | 146 | 2.3 | 0.2 | 10.2 | Yes | 5.2 | 97 | 88 | 35 | 3.9 |
| 9. | MMS | Sickle cell disease | negative | 17 | 19 | 475 | 94.7 | 0 | 1.5 | 0.8 | 0.2 | 16 | Yes | 8 | 95 | 90 | 38.6 | 29.3 |
| 10. | MMD | none | negative | 17 | 22 | 363 | 92 | 17.7 | 76 | 0.3 | 1.2 | 8.8 | Yes | 0.7 | 98 | 94 | 45 | 0 |
| 11. | MMD | none | positive | 16 | 23.8 | 461 | 94.4 | 7 | 92.5 | 0.7 | 0.1 | 9.6 | Yes | 1.4 | 97 | 94 | 42 | 0 |

**Note:** Age and body mass index (BMI) were documented at the time of polysomnography (PSG) assessment. Sleep fragmentation was determined based on the overall clinical interpretation documented in the sleep physician’s report. BMI, body mass index; CAHI, central apnea–hypopnea index; ODI, oxygen desaturation index; OAHI, obstructive apnea-hypopnea index; PLMI, periodic limb movement index; PSG, polysomnography; REM, rapid eye movement; SpO₂, oxygen saturation; TcCO₂, transcutaneous carbon dioxide.
